# Supplementary material
Source: PubMed Central journal article supplement (PMC5706633)

Figure 1d

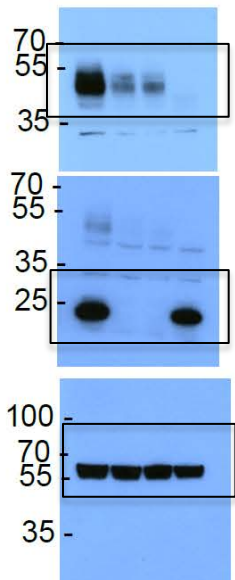

Figure 1f

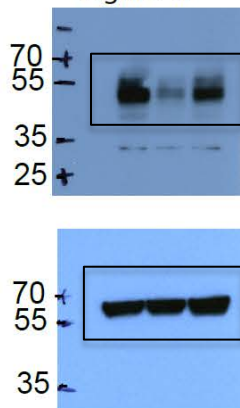

Figure 2a

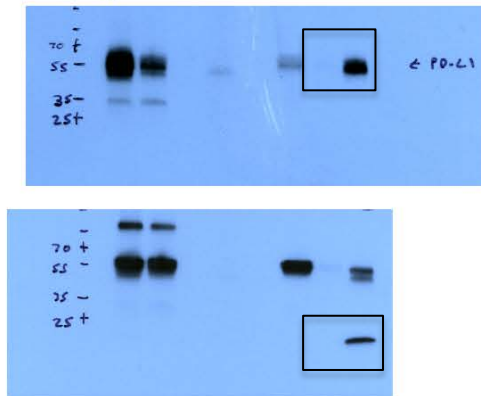

Figure 2a

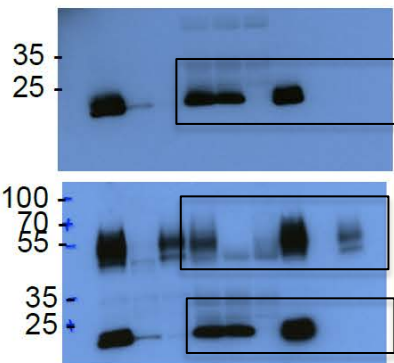

Figure 2b

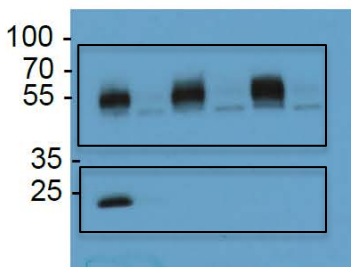

Figure 3a

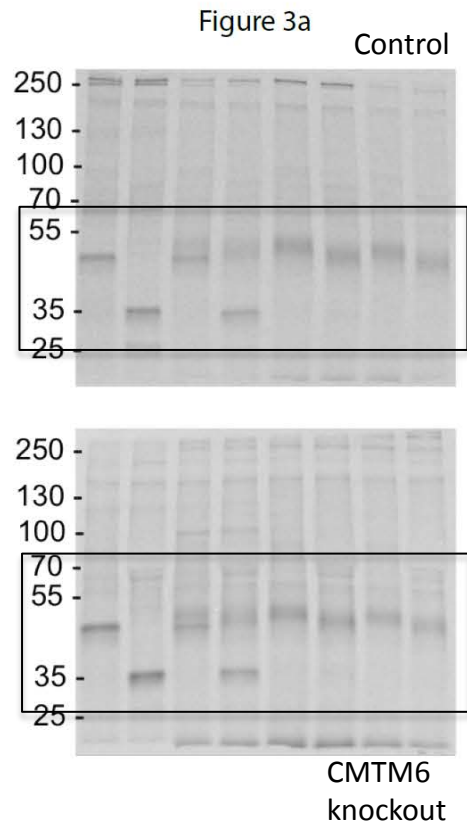

Figure 3e

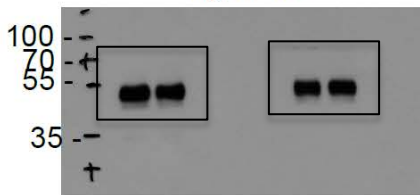

Figure 4a

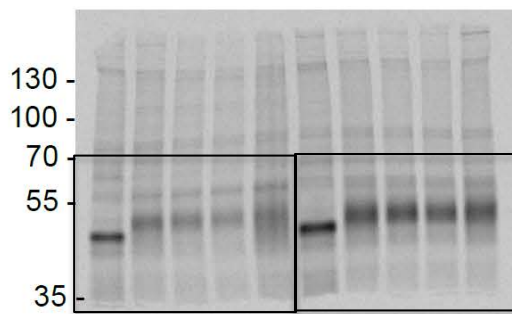

Figure 4c

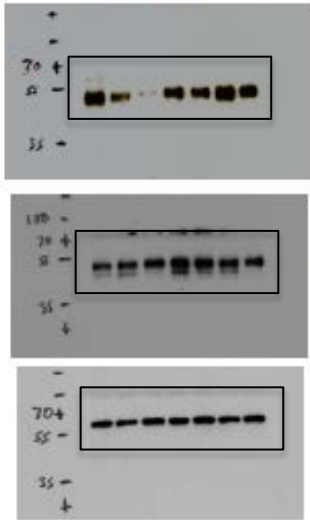

Figure 4d

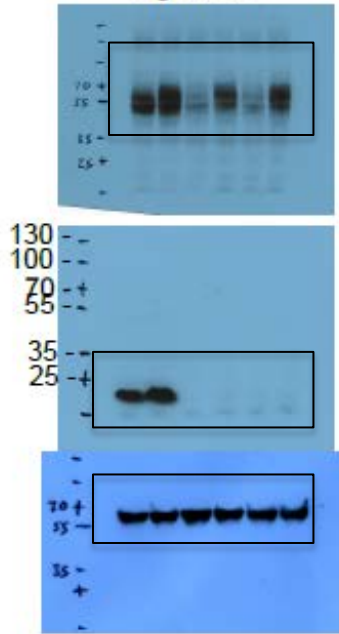

Extended Data Fig. 1c

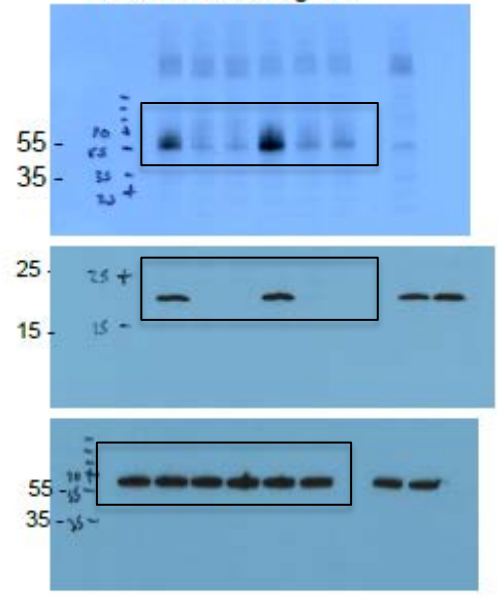

Extended Data Fig. 5a

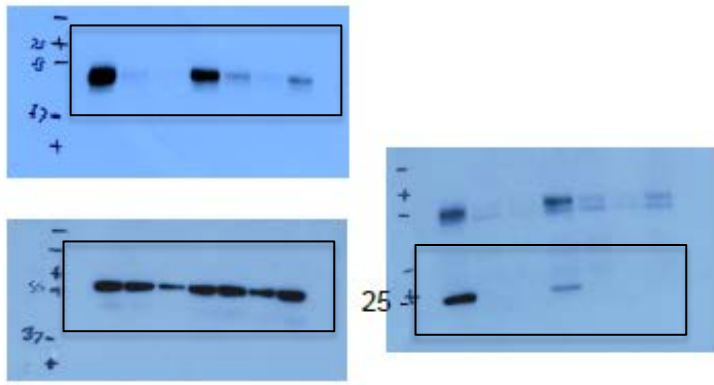

Extended Data Fig. 6d

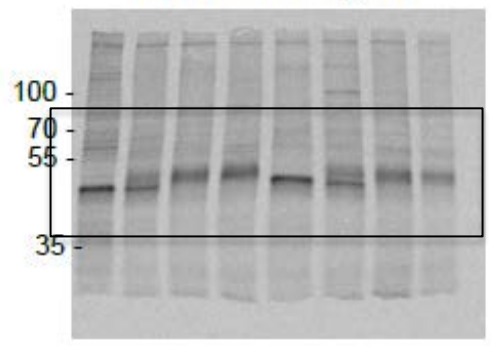

Extended Data Fig. 9c

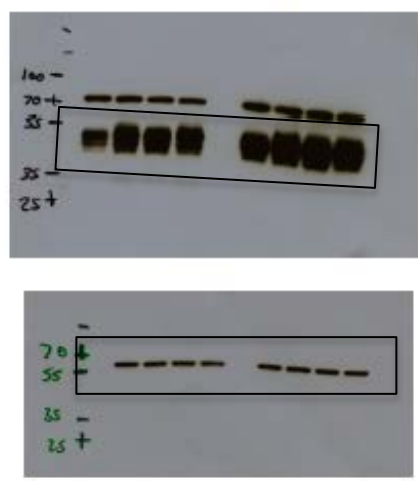

Extended Data Fig. 6g

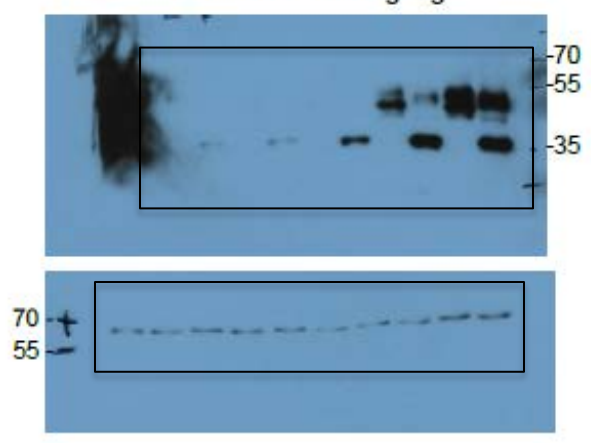

Supplement: NIHMS75058-supplement-Source_Gels.pdf [file NIHMS75058-supplement-Source_Gels.pdf]
